# Supplementary material
Source: Research Square preprint supplement (doi:10.21203/rs.3.rs-9518543/v1)
Supplement: Supplementary file 1 [file dedc18abacc4eadf8547b462.pdf]

Near-Field Coupling in Plasmonic Nanoarrays:  
Tailoring Radiative and Non-Radiative Losses  
Through Gap Engineering: Supporting Information

Benedict Morris<sup>1\*</sup> and Bruno Palpant<sup>1</sup>

<sup>1\*</sup>Université Paris-Saclay, CNRS, ENS Paris-Saclay, CentraleSupélec,  
LuMIn, Gif-sur-Yvette, 91190, State, France.

\*Corresponding author(s). E-mail(s):

[benedict.morris@centralesupelec.fr](mailto:benedict.morris@centralesupelec.fr);

Contributing authors: [Bruno.palpant@centralesupelec.fr](mailto:Bruno.palpant@centralesupelec.fr);

## 1 Figures

001  
002  
003  
004  
005  
006  
007  
008  
009  
010  
011  
012  
013  
014  
015  
016  
017  
018  
019  
020  
021  
022  
023  
024  
025  
026  
027  
028  
029  
030  
031  
032  
033  
034  
035  
036  
037  
038  
039  
040  
041  
042  
043  
044  
045  
046

047  
 048  
 049  
 050  
 051  
 052  
 053  
 054  
 055  
 056  
 057  
 058  
 059  
 060  
 061  
 062  
 063  
 064  
 065  
 066  
 067  
 068  
 069  
 070  
 071  
 072  
 073  
 074  
 075  
 076  
 077  
 078  
 079  
 080  
 081  
 082  
 083  
 084  
 085  
 086  
 087  
 088  
 089  
 090  
 091  
 092

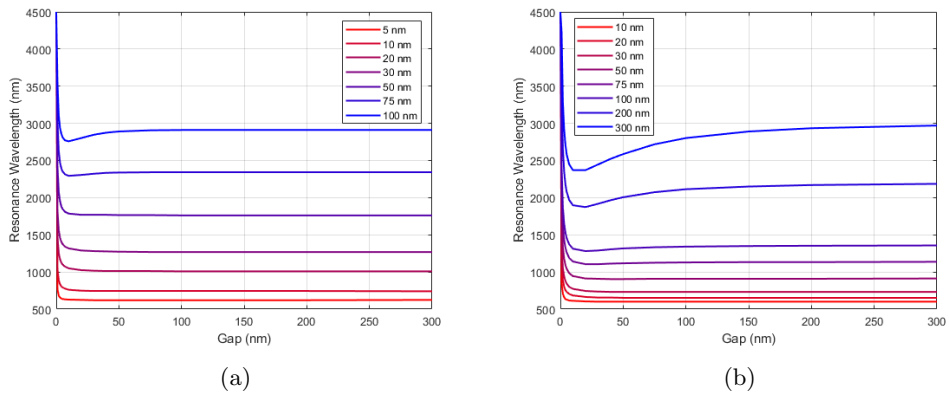

**Fig. S1:** Resonance wavelength extracted from FDTD simulations of the longitudinal dipolar localised surface plasmon resonance for different nanorod geometries as a function of interparticle edge-to-edge distance (gap). **(a)** Gold nanorods are 2 nm in height, **(b)** gold nanorods are 20 nm in height.

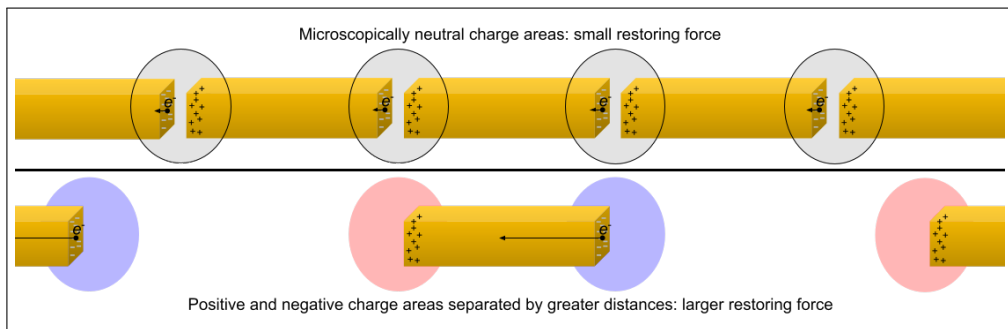

**Fig. S2:** Illustration of the charge screening for small gaps that leads to a smaller restoring force, red-shifted resonance, and reduced absorbance.

093  
094  
095  
096  
097  
098  
099  
100  
101  
102  
103  
104  
105  
106  
107  
108  
109  
110  
111  
112  
113  
114  
115  
116  
117  
118  
119  
120  
121  
122  
123  
124  
125  
126  
127  
128  
129  
130  
131  
132  
133  
134  
135  
136  
137  
138

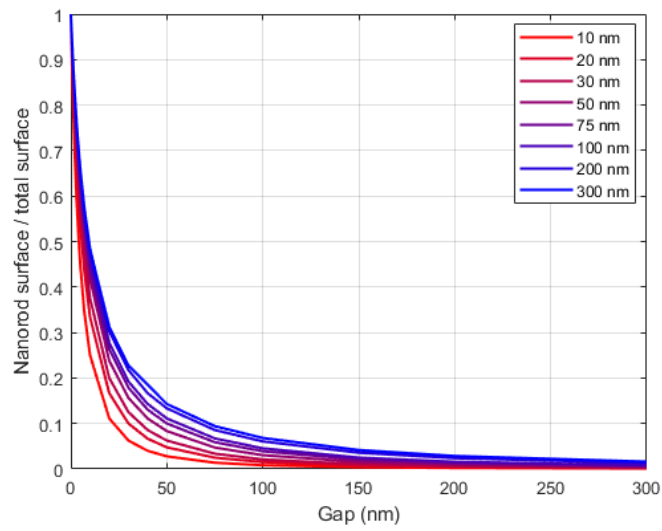

**Fig. S3:** Ratio of gold nanorod surface area to total surface area as a function of gap for different gold nanorod lengths.

139  
 140  
 141  
 142  
 143  
 144  
 145  
 146  
 147  
 148  
 149  
 150  
 151  
 152  
 153  
 154  
 155  
 156  
 157  
 158  
 159  
 160  
 161  
 162  
 163  
 164  
 165  
 166  
 167  
 168  
 169  
 170  
 171  
 172  
 173  
 174  
 175  
 176  
 177  
 178  
 179  
 180  
 181  
 182  
 183  
 184

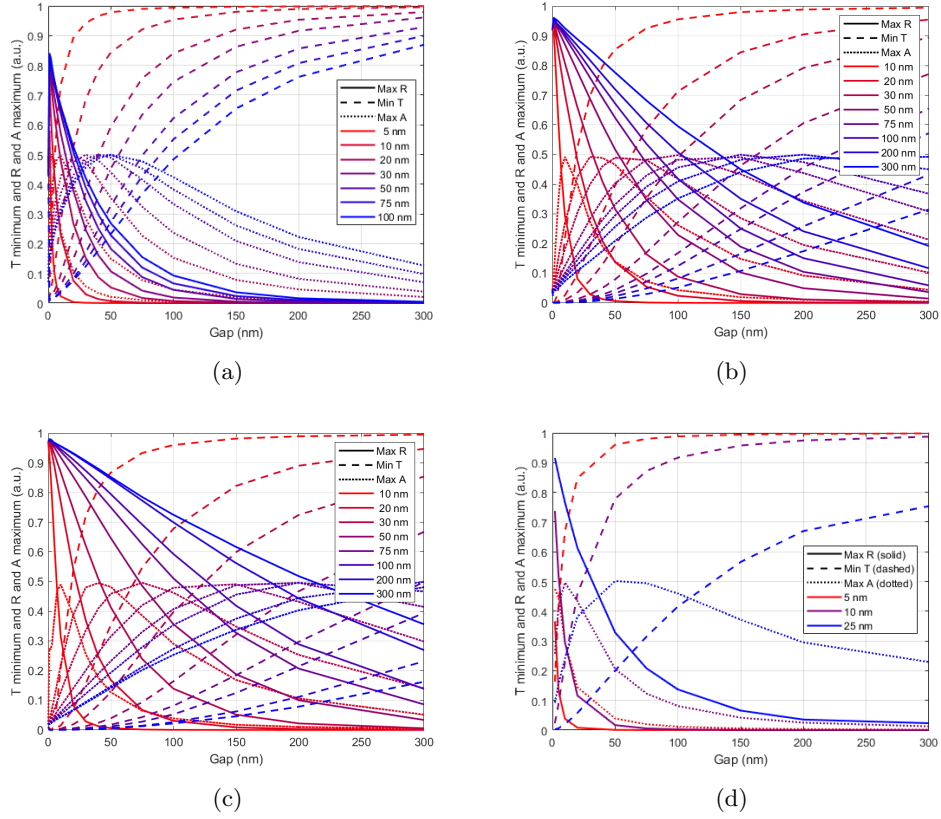

**Fig. S4:** Minima of transmittance (dashed lines), maxima of reflectance (solid lines) and maxima of absorptance (dotted lines) for different gold nanorod lengths as a function of gap from FDTD simulations. There are less lengths in the 2 nm high nanorod arrays due to resonance wavelength being out of our range for lengths above 100 nm. **(a)** 2 nm high nanorods, **(b)** 10 nm high nanorods, **(c)** 20 nm high nanorods, **(d)** spheres of radii 5, 10 and 25 nm.
